# Supplementary material
Source: HighWire-hosted journal article supplement (https://bmjopenquality.bmj.com/highwire/filestream/136068/field_highwire_adjunct_files/0/ds3399.docx)

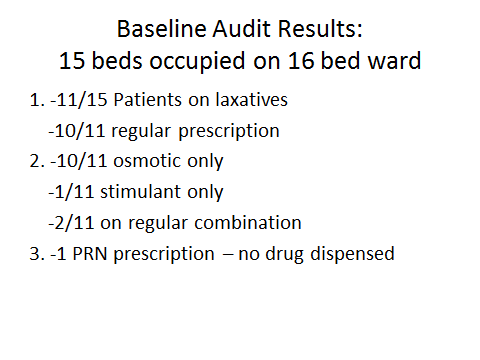

Supplement: ds3399.docx [file ds3399.docx]
